# Supplementary material for: Charting the quantitative relationship between two-dimensional morphology parameters of polyamide membranes and synthesis conditions
Source: Royal Society of Chemistry journal article supplement (doi:10.1039/c9me00132h), 2019-10-23
Supplement: c9me00132h1.pdf [file c9me00132h1.pdf]

## Supporting Information

### **Charting the quantitative relationship between two-dimensional morphology parameters of polyamide membranes and synthesis conditions**

Hyosung An,<sup>a,b</sup> John W. Smith,<sup>a</sup> Wenxiang Chen,<sup>a,b</sup> Zihao Ou,<sup>a</sup> and Qian Chen<sup>a,b,c,d,\*</sup>

<sup>a</sup>Department of Materials Science and Engineering, <sup>b</sup>Materials Research Laboratory, <sup>c</sup>Department of Chemistry, <sup>d</sup>Beckman Institute for Advanced Science and Technology, University of Illinois at Urbana-Champaign, Urbana, Illinois 61801, United States.

\*To whom correspondence should be addressed. Email: qchen20@illinois.edu

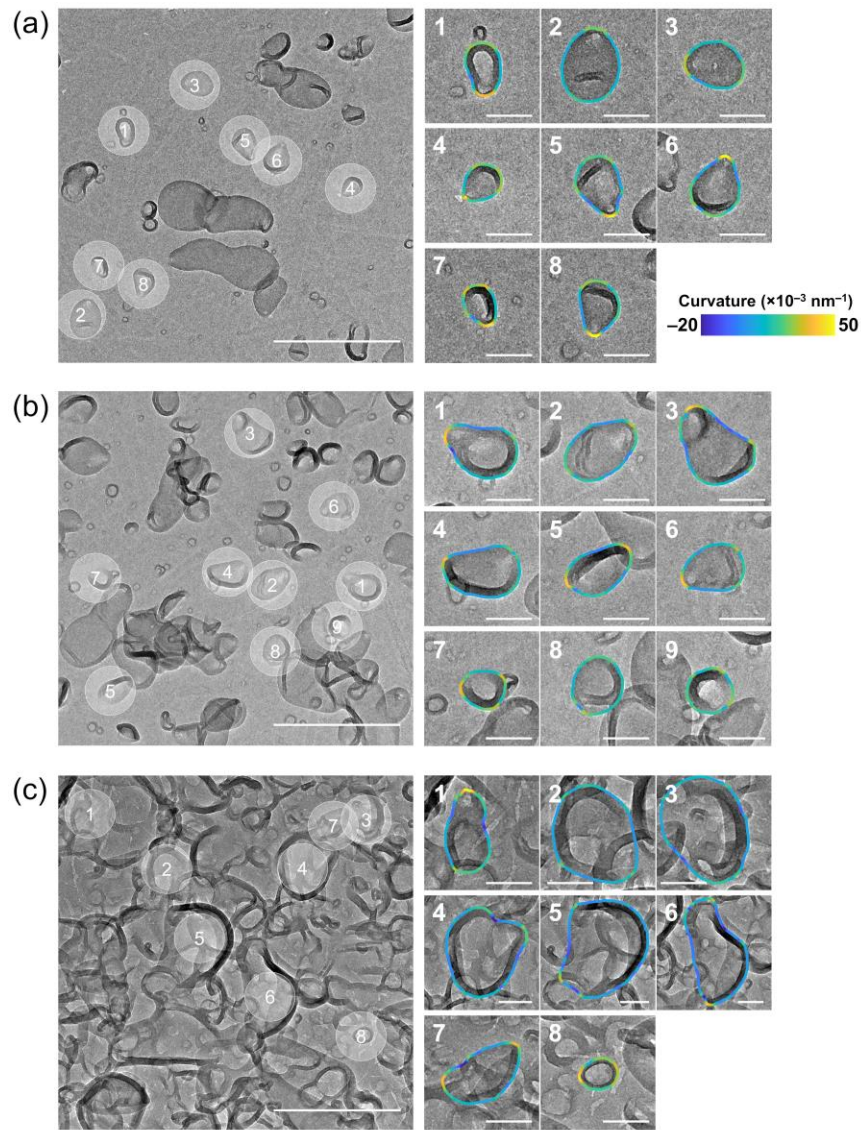

**Fig. S1** (left) Low- and (right) high-magnification TEM images of polyamide membranes prepared with fixed  $c_{TMC}$  (0.05%) but varying (a)  $c_{MPD}$  of 1%, (b)  $c_{MPD}$  of 2%, and (c)  $c_{MPD}$  of 5%. TEM images are overlaid with surface contour colour-coded according to local surface curvature. Scale bars: 500 nm (left) and 100 nm (right).

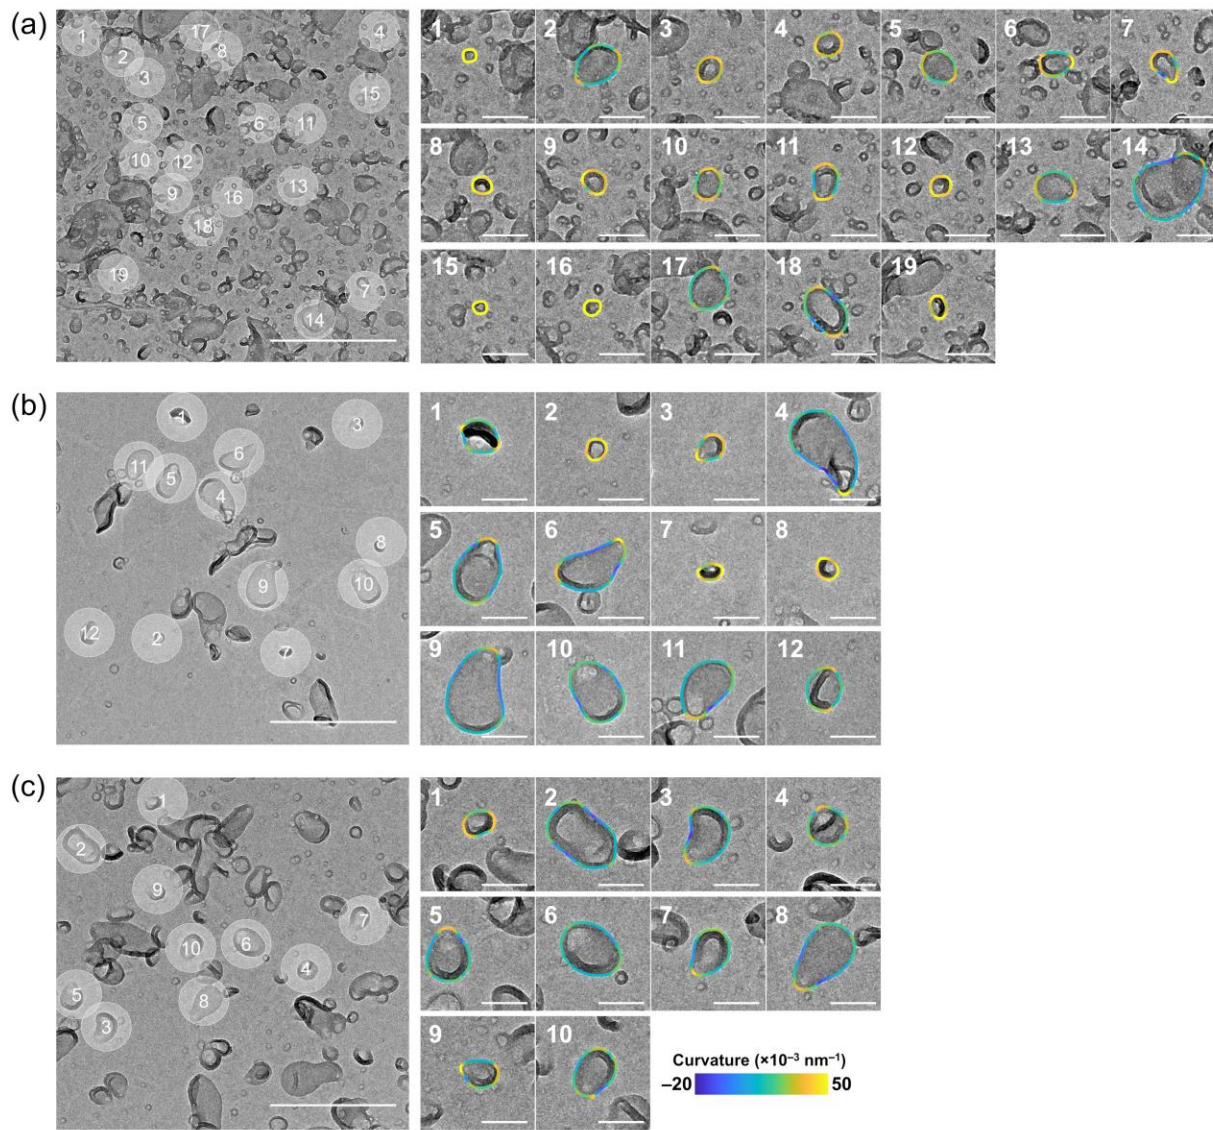

**Fig. S2** (left) Low- and (right) high-magnification TEM images of polyamide membranes prepared with (a)  $c_{\text{MPD}}$  of 1% and  $c_{\text{TMC}}$  of 1% TMC, (b)  $c_{\text{MPD}}$  of 1% and  $c_{\text{TMC}}$  of 0.1%, and (c)  $c_{\text{MPD}}$  of 2% and  $c_{\text{TMC}}$  of 0.1%. TEM images are overlaid with surface contour colour-coded according to local surface curvature. Scale bars: 500 nm (left) and 100 nm (right).

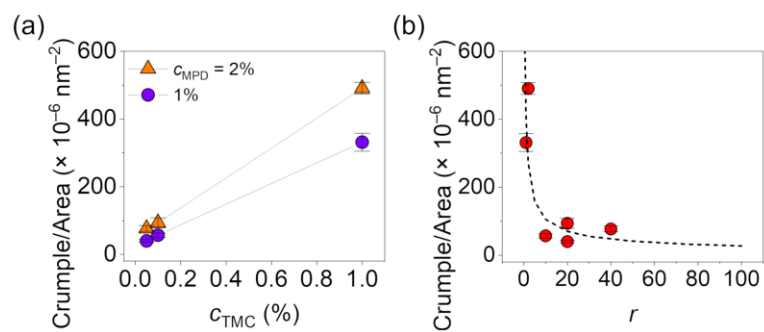

**Fig. S3** Average number density of crumples as a function of (a)  $c_{\text{TMC}}$  and (b) the concentration ratio of MPD to TMC  $r$ . Error bars denote standard deviation. Crumple density increases with increasing  $c_{\text{TMC}}$ .

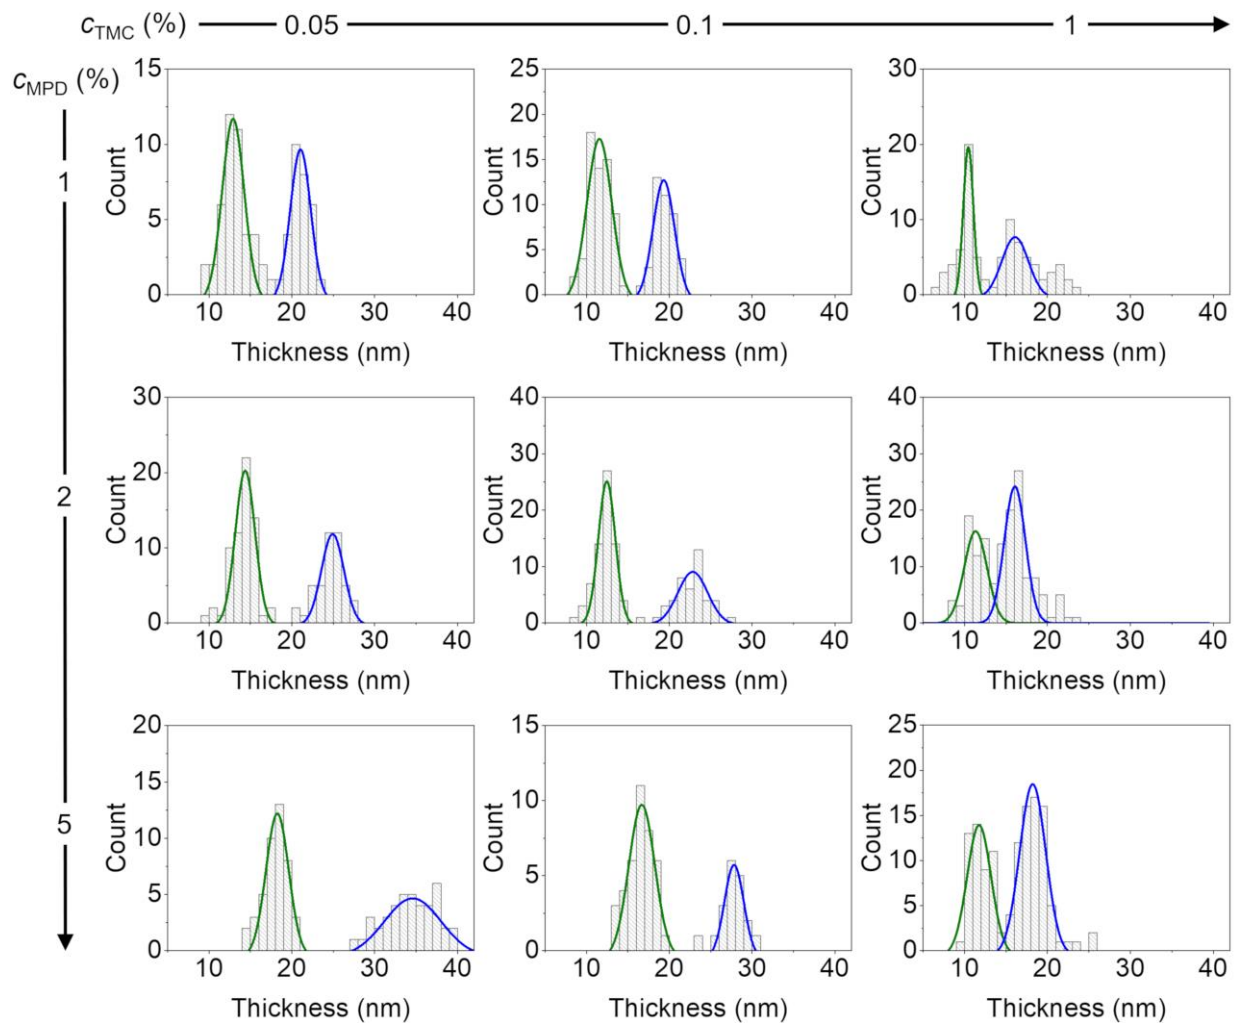

**Fig. S4** Histograms of crumple thickness for polyamide membranes synthesized at different monomer concentrations as denoted by arrows.

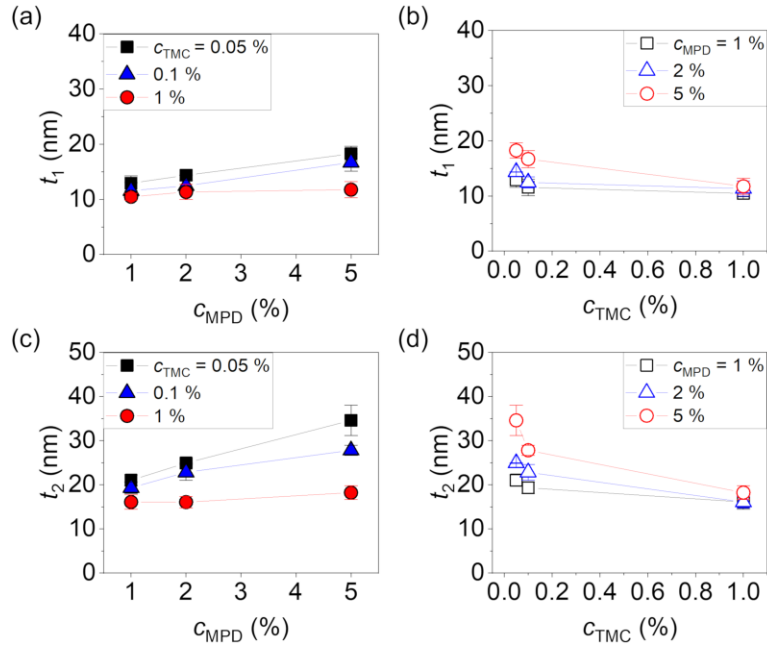

**Fig. S5** Average crumple thickness of  $t_1$  as a function of (a)  $c_{MPD}$  with fixed  $c_{TMC}$  (0.05%) and (b)  $c_{TMC}$  with fixed  $c_{MPD}$  (1%). Average crumple thickness of  $t_2$  as a function of (c)  $c_{MPD}$  with fixed  $c_{TMC}$  (0.05%) and (d)  $c_{TMC}$  with fixed  $c_{MPD}$  (1%).

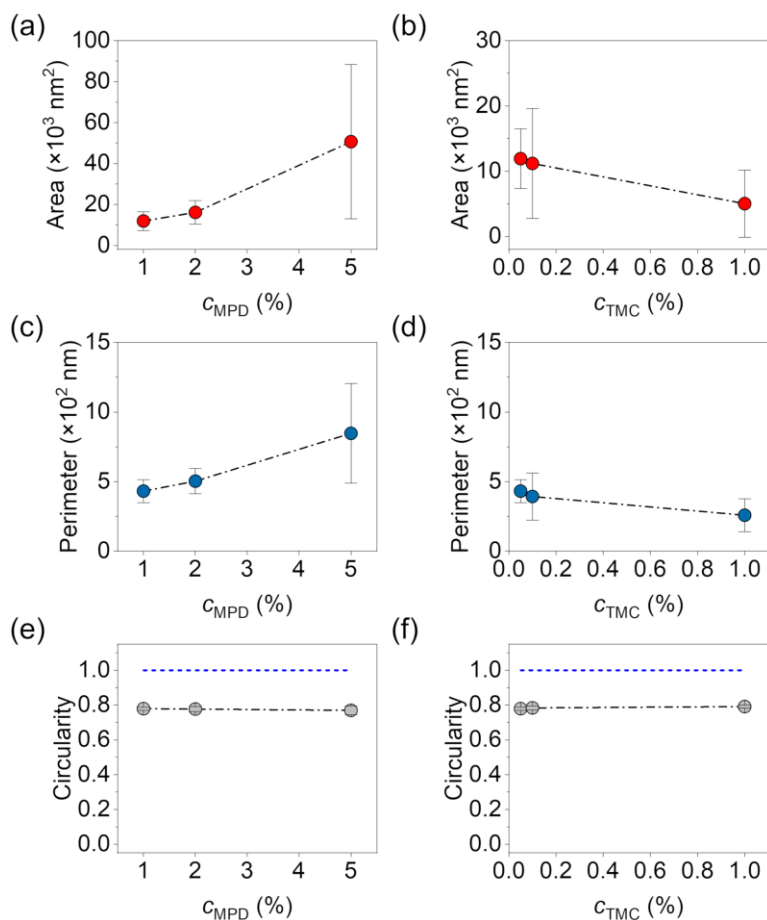

**Fig. S6** Average projected area of crumples as a function of (a)  $c_{MPD}$  with fixed  $c_{TMC}$  (0.05%) and (b)  $c_{TMC}$  with fixed  $c_{MPD}$  (1%). Average perimeter of crumples as a function of (c)  $c_{MPD}$  with fixed  $c_{TMC}$  (0.05%) and (d)  $c_{TMC}$  with fixed  $c_{MPD}$  (1%). Average circularity of crumples as a function of (e)  $c_{MPD}$  with fixed  $c_{TMC}$  (0.05%) and (f)  $c_{TMC}$  with fixed  $c_{MPD}$  (1%). The black dot-dashed lines in (a-f) are guide to the eye. The dashed blue lines in (e) and (f) are the scaling of perfect circular shape (circularity = 1).



**Table 1** Summary of the fitting equations from Fig. 5.

| <b><math>x</math></b> | <b><math>y</math></b>            | <b>Fitting eq.</b> | <b><math>R^2</math></b> |
|-----------------------|----------------------------------|--------------------|-------------------------|
| $F_{\max}$ (nm)       | $F_{\min}$ (nm)                  | $y = 0.67x$        | 0.99                    |
| $F_{\max}$ (nm)       | Curvature ( $\mu\text{m}^{-1}$ ) | $y = 3.1x^{-1.03}$ | 0.98                    |
| $F_{\max}$ (nm)       | Perimeter (nm)                   | $y = (0.95)\pi x$  | 0.98                    |
| $F_{\max}$ (nm)       | Area ( $\text{nm}^2$ )           | $y = \pi(x/2.4)^2$ | 0.98                    |
